# Supplementary material
Source: PubMed Central journal article supplement (PMC3891590)
Supplement: NIHMS513486-supplement-1.pdf [file NIHMS513486-supplement-1.pdf]

## Supplementary Information

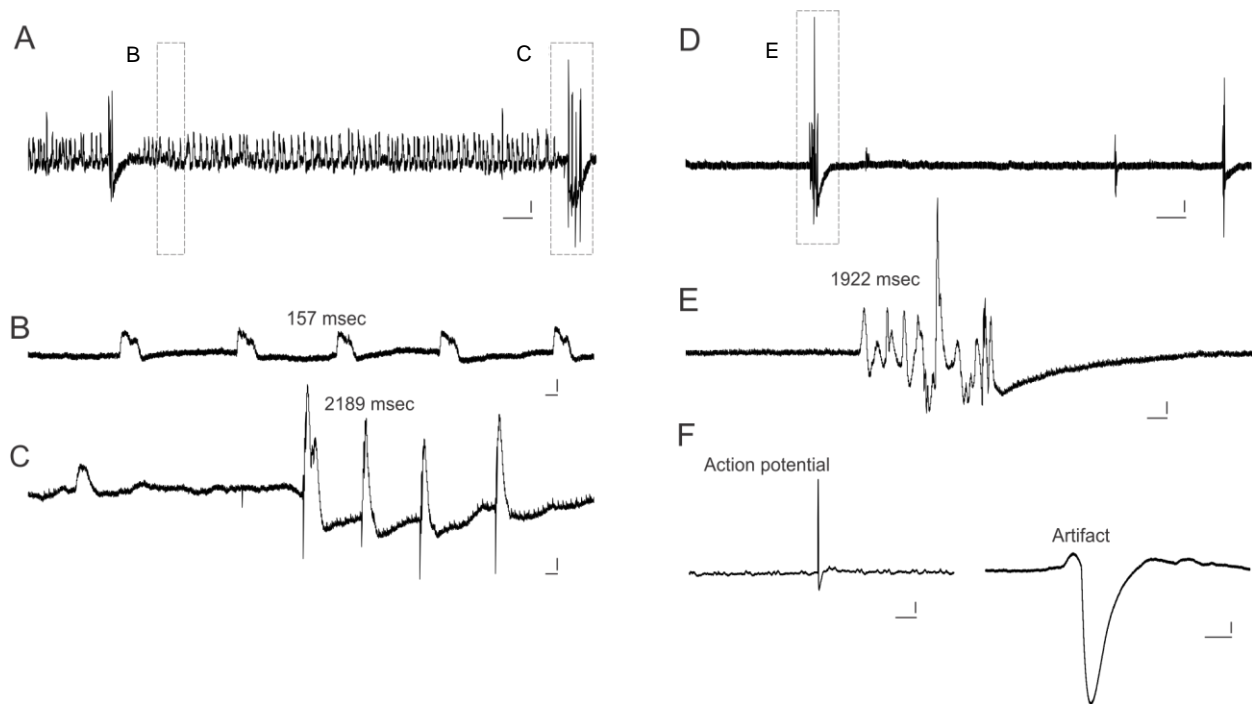

### Supplementary Figure S1: Electrographic activity in mutant zebrafish at higher resolution

Temporal expansions of electrographic activity are shown for *scn1Lab* mutants at 4 dpf (A) sample trace showing prominent short-duration, small amplitude, high frequency “interictal” like events with long-duration, large amplitude, low frequency multi-spike “ictal” like events. Note the silencing of electrographic discharge following the larger events. (B) temporal expansion of interictal events; typical frequency for one such event is shown. (C) temporal expansion of ictal events; typical frequency for this event is shown. (D) sample trace from a different mutant zebrafish showing prominent ictal burst activity. Panel expansion (E) as in A. (F) Sample intracellular recording of an individual action potential and an example of a twitch artifact (note the slow duration and lack of multi-spike activity in the latter). Scale bars A and D: 1 mv, 1 s; B and C, 1 mV, 100 ms; E and F: 1 mV, 50 ms.

**Supplementary Table S1: Drug candidates showing lethality in locomotion assay**

|                              |                            |                                |                               |
|------------------------------|----------------------------|--------------------------------|-------------------------------|
| acetarsol                    | carzenide                  | fendiline HCl                  | orotic acid                   |
| acetyl-L-leucine             | <b>cetrimonium bromide</b> | formestane                     | oxinacic acid                 |
| acipomox                     | chiniofon                  | fosfosal                       | paroxypropione                |
| acriflavinium HCl            | chlorazanyl hydrochloride  | ftaxelide                      | picolamine                    |
| afalanine                    | chlormidazole              | guaiacol                       | pidolic acid                  |
| alexidine HCl                | chlorryrifos               | hexamethonium bromide          | pidotimod                     |
| allythiourea                 | cinchopen                  | hexetidine                     | piperonyl butoxide            |
| artemisinin                  | climbazole                 | hydroquinidine                 | pranoprofen                   |
| <b>benzyl isothiocyanate</b> | clofibric acid             | hydroxytuluic acid             | prasterone                    |
| beta-ESCIN                   | clofoctol                  | idebenone                      | proflavine hemisulfate        |
| beta-naphthol                | coumarin                   | iproheptine                    | propoxur                      |
| bornyl acetate               | cyclandelate               | irsogladine maleate            | salinomycin                   |
| bromopride                   | dexfosfoserine             | kainic acid                    | securinine                    |
| bronopol                     | <b>dibutyl phthalate</b>   | levomentol                     | sodium tetradecyl sulfate     |
| butylated hydroxytoluene     | <b>dichlorophen</b>        | mexeneone                      | strychnine                    |
| camylofine dihydrochloride   | drofenine HCl              | miltefosine                    | sulfaguanidine                |
| carbarsonne                  | ebselen                    | nadifloxacin                   | talsigel                      |
| carglumic acid               | efloxate                   | nitroxoline                    | tioxolone                     |
| carmofur                     | ethaverine HCl             | N-methyl (-)ephedrine [1R, 2S] | tiratricol                    |
| carsalam                     | exalamide                  | nonivamide                     | trimetazidine dihydrochloride |
|                              |                            |                                | vincamine                     |

List of MicroSource International Drug Collection compounds that were lethal in the locomotion assay at a test concentration of 667  $\mu$ M. Drugs lethal in a 1:100 dilution re-trial are indicated in **bold**.

**Supplementary Table S2: Primer sequences for qPCR**

| Gene name                                                                               | Gene symbol  | Gene Bank      | Sequence                         |
|-----------------------------------------------------------------------------------------|--------------|----------------|----------------------------------|
| actin beta                                                                              | $\beta$ -act | FJ915059       | F, 5' CATCCATCGTTCACAGGAAGTG 3'  |
|                                                                                         |              |                | R, 5' TGGTCGTTTCGTTTGAATCTCAT 3' |
| sodium channel, voltage-gated, type I like, alpha b                                     | scn1lab      | NM_001044895   | F, 5' GAGCGGTTTGACCCCAATG 3'     |
|                                                                                         |              |                | R, 5' GGCAATGCGTAATGGAGGAT 3'    |
| sodium channel, voltage-gated, type VIII, alpha a                                       | scn8aa       | NP_571703      | F, 5' TGGCTGGATTTTCATGGTCATC 3'  |
|                                                                                         |              |                | R, 5' GAATGTGCGCAGAGCTGACA 3'    |
| sodium channel, voltage-gated, type VIII, alpha b                                       | scn8ab       | NP_001038648.1 | F, 5' GCCGTGGCTCTCTCTTCGT 3'     |
|                                                                                         |              |                | R, 5' AGCCAGCGGGTTAATTCGA 3'     |
| hyperpolarization activated cyclic nucleotide-gated potassium channel 1                 | hcn1         | XM_696184      | F, 5' CAGATGTCATCGGGTGCATTA 3'   |
|                                                                                         |              |                | R, 5' TCTCCTGGAGCCCGTTGA 3'      |
| homer homolog 1                                                                         | homer1       | BC076306.1     | F, 5'CGCCGTGGGATCTATTCAGT3'      |
|                                                                                         |              |                | R, 5' TTATGAGCAGCGGCATTCTG3'     |
| brain-derived neurotrophic factor                                                       | bdnf         | FJ915060       | F, 5' TCGAAGGACGTTGACCTGTATG 3'  |
|                                                                                         |              |                | R, 5' TGGCGGCATCCAGGTAGT 3'      |
| ATPase, Na <sup>+</sup> /K <sup>+</sup> transporting, alpha 1a.5 polypeptide            | atp1a1a.5    | NM_178099      | F, 5' CCGTGATGCTTGGCTTTACTT 3'   |
|                                                                                         |              |                | R, 5' GCGACAATGAGCCCAATAAGA 3'   |
| ankyrin repeat and KH domain containing 1                                               | ankhd1       | NM_001199768   | F, 5' CCTCCGCCAACGTGTCTTT 3'     |
|                                                                                         |              |                | R, 5' AAGGGCAAGCTGAGGATGAG 3'    |
| calsyntenin 1                                                                           | clstn1       | NM_001077784   | F, 5' CTGCTGGACCCTCTCTGATAG 3'   |
|                                                                                         |              |                | R, 5' TGAATCCTGAAGCCGCAGAT 3'    |
| NMDA receptor regulated 2                                                               | narg2        | XM_001344415   | F, 5' GGAGTCCTTCGGCGAGTCT 3'     |
|                                                                                         |              |                | R, 5' TCGGATTAAGCCGGTTGT 3'      |
| transient receptor potential cation channel, subfamily C, member 4 associated protein a | trpc4apa     | NM_131569      | F, 5' GGTGGAAGTGCTTTACGTGCTT 3'  |
|                                                                                         |              |                | R, 5' ACGAAACTCCGCCAACATTT 3'    |
| GTP cyclohydrolase 2                                                                    | gch2         | NM_131667      | 5' CATGCGTGGAGTGCAGAAG 3'        |
|                                                                                         |              |                | R, 5' GGCCTTTGGATCCTCTCTGAA 3'   |
| solute carrier family 24, member 5                                                      | slc24a5      | NM_001030280   | F, 5' GGTGGCCCCGAGAAGGTAAAT 3'   |
|                                                                                         |              |                | R, 5' CAGGCCAGACACAGCATATC 3'    |
| amiloride-sensitive cation channel 1                                                    | accn1        | NM_214788      | F, 5' ATGTTTAACGCTGCCGAAGAG 3'   |
|                                                                                         |              |                | R, 5' CAACATGATCTCCAGGCCATT 3'   |
| calcium/calmodulin-dependent protein kinase II inhibitor 2                              | camk2n2      | NM_001002642   | F, 5' GGCAAAACACGTGGTCATTG 3'    |
|                                                                                         |              |                | R, 5' ACACGCCGGGTGATGACTT 3'     |

|                                                |       |              |                                 |
|------------------------------------------------|-------|--------------|---------------------------------|
| neuronal calcium sensor 1a                     | ncs1a | NM_200465    | F, 5' AAACGAGTTGATCGCATCTTTG 3' |
|                                                |       |              | R, 5' GAGCCCTCCTGAAACTCCTGTA 3' |
| calcineurin B homologous protein 2             | chp2  | NM_199836    | F, 5' TCGACCCAAAGAGCCCAAT 3'    |
|                                                |       |              | R, 5' GGCATACAGCTGAAACGCAAA 3'  |
| pro-melanin concentrating hormone-like protein | pmchl | NM_001162488 | F, 5' CAGAGCGCAGAGAAGTTGGTT 3'  |
|                                                |       |              | R, 5' TCCCACCATGCACCTCATG 3'    |
| desmin b                                       | desmb | NM_001077452 | F, 5' TGGCCCTGGATGTGGAGAT 3'    |
|                                                |       |              | R, 5' ACGACTGCATGGGCATCAC 3'    |
| somatolactin beta                              | smtlb | NM_001037674 | F, 5' TGTGGTGGTTCTGGTCTGCTT 3'  |
|                                                |       |              | R, 5' ACGTCCCTCCAATCTCTTGGT 3'  |

Real-time qPCR primer sequences and GeneBank accession numbers for the SybrGreen assays.

Primers were designed using Primer Express v3.0 software (Applied Biosystems).

### Supplementary Table S3: Primer sequences for RT-PCR

| Gene symbol  | GeneBank       | Sequence                                                                                                                                                                                           |
|--------------|----------------|----------------------------------------------------------------------------------------------------------------------------------------------------------------------------------------------------|
| $\beta$ -act | AF057040       | F, 5' GGACTCTGGTGATGGTGTGA 3'<br>R, 5' CACCGATCCAGACGGAGTAT 3'                                                                                                                                     |
| scn11ab      | NM_001044895   | F, 5' GCAAAGAGAACTGCCTGTCC 3'<br>R, 5' GCGTTCACTACCACCCTCAT 3'<br>F, 5' GGTCATGGTCATTGGGAATC 3'<br>R, 5' ACTTCCCTCCACGTCAGATG 3'<br>F, 5' CATCTGACGTGGAGGGAAGT 3'<br>R, 5' ACAGCTCGTCGTTGGTGATA 3' |
| scn8aa       | NP_571703      | F, 5' CAGCAATCCTCCAGAATGGT 3'<br>R, 5' ACGATCCACAAAGATCACC 3'<br>F, 5' TGAAGAAGCTGTCCGATGTG 3'<br>R, 5' GTCTCCCTTCTCCTCCTGCT 3'<br>F, 5' TGAAGAAGCTGTCCGATGTG 3'<br>R, 5' GCTCTGGAGCTCAGTTTGG 3'   |
| scn8ab       | NP_001038648.1 | F, 5' TGTGGAAGAGCTGGAGGAGT 3'<br>R, 5' AGCACCCGGAACACAATTAG3'<br>F, 5' GGGCTCAGAGAACGAGTTTG 3'<br>R, 5' TGAACACCAGGTTTCCAACA 3'<br>F, 5' GGCCTCCATCATGAATCAGT 3'<br>R, 5' ACAGAAAGCACCTCCTCGAA 3'  |
| hcn1         | XM_696184      | F, 5' AATCCTCCCCAGCCTCTTTA 3'<br>R, 5' TGCTTAAGACTGCCGACTCTC<br>3'<br>F, 5' TGAGTGTCGAAGGGAAGAAGA<br>3'<br>R, 5' CTGGTGGTTGGGGTAAAGAG 3'                                                           |

Primer's sequences and GeneBank accession numbers for the investigated genes in conventional RT-PCR.
